# Supplementary material
Source: publisher site journal article supplement (https://www.dovepress.com/article/286976)
Supplement: Supplementary file 1 [file get_supplementary_file.php]

## Supplementary material

### STUDY QUESTIONNAIRE

Assessment of adequacy of improved sources of drinking water, sanitation, and hygiene practice for the reduction of diarrheal disease among people live with HIV/AIDS, Harar region, Ethiopia.

|   |                                                          |   |                                            |
|---|----------------------------------------------------------|---|--------------------------------------------|
| 1 | Name of the district<br>-----                            | 4 | Interviewer name and signature<br>-----    |
| 2 | Name of the kebele<br>-----                              | 5 | Supervisor Name and signature<br>-----     |
| 3 | Day /Month /Year of data collection<br>-----/-----/----- | 6 | Completed ----- 1<br>Not completed ----- 2 |

#### Part I: Socio-demographic characteristics

| No | Question                                   | Alternatives                                                                                           |
|----|--------------------------------------------|--------------------------------------------------------------------------------------------------------|
| 7  | Sex                                        | Male-----1<br>Female -----2                                                                            |
| 8  | Age of the interviewee( in complete years) | -----                                                                                                  |
| 9  | Marital status of the interviewee          | Married -----1<br>Single -----2                                                                        |
| 10 | Family size                                | One-----1<br>Two-----2<br>Three-----3<br>Four-----4<br>Five and above-----5                            |
| 11 | Educational status of the interviewee      | No schooling -----1<br>Primary school -----2<br>Secondary school -----3<br>Post-secondary school-----4 |
| 12 | Religion of the interviewee                | Muslim -----1<br>Orthodox -----2<br>Protestant -----3<br>Other religion (specify)----4                 |
| 13 | Ethnicity of the interviewee               | Oromo -----1<br>Amhara -----2<br>Gurage -----3<br>Harari-----4<br>Other (specify) -----5               |
| 14 | Occupation of the interviewee              | Self-employed -----1<br>Government employed -----2<br>Other (specify) -----3                           |
| 15 | Monthly income of the interviewee          | -----[in, birr]                                                                                        |

#### Part II: Household questionnaire related to Sources of Drinking Water

|    |                                                                           |                                                                                           |
|----|---------------------------------------------------------------------------|-------------------------------------------------------------------------------------------|
| 16 | What is the main source of drinking water for members of your house hold? | Pipe water -----1<br>Public tap -----2<br>Protected well-----3<br>Unprotected well -----4 |
|----|---------------------------------------------------------------------------|-------------------------------------------------------------------------------------------|

|    |                                                                                                                                       |                                                                                                                                                                                                                                          |
|----|---------------------------------------------------------------------------------------------------------------------------------------|------------------------------------------------------------------------------------------------------------------------------------------------------------------------------------------------------------------------------------------|
|    |                                                                                                                                       | Protected spring -----5<br>Unprotected spring -----6<br>Surface water (river, stream, pond) -----7<br>Other (specify)----- 8                                                                                                             |
| 17 | What is the main source of water used by your household for other purposes such as cooking and washing?                               | Piped water -----1<br>Public tap /standpipe -----2<br>Protected well -----3<br>Unprotected well -----4<br>Protected spring -----5<br>Unprotected spring -----6<br>Surface water (river, stream, Pond)-----7<br>Other ( specify )----- .8 |
| 18 | where is that water source located?                                                                                                   | In own dwelling -----1<br>In own yard /plot -----2<br>Elsewhere -----3                                                                                                                                                                   |
| 19 | How long does it take to go there to get the water and come back? (mention minute and distance)                                       | Number of minutes -----1<br>Number of meter/Km-----2                                                                                                                                                                                     |
| 20 | What container is used to fetch water?                                                                                                | Type of containers----- 1                                                                                                                                                                                                                |
| 21 | How many of it used per day(measure its volume)                                                                                       | Number of containers----- 1                                                                                                                                                                                                              |
| 22 | Quantity of water consumption per capita per day?(ask the frequency of use and measure their material before fill quantity of water)  | For drinking only ----- lcd                                                                                                                                                                                                              |
| 23 | Basic water service level                                                                                                             | For general hygiene-----lcd                                                                                                                                                                                                              |
| 24 | Do you think that disease can be transmitted through contaminated water                                                               | Yes ----- 1<br>No ----- 2                                                                                                                                                                                                                |
| 25 | Do you think that your water is safe?                                                                                                 | Yes ----- 1<br>No ----- 2                                                                                                                                                                                                                |
| 26 | Do you know methods used to treat water at home?                                                                                      | yes .....1<br>No..... , 2                                                                                                                                                                                                                |
| 27 | Have you ever treated your water with household water treatment?                                                                      | yes..... , 1<br>No..... , 2                                                                                                                                                                                                              |
| 28 | If Q28 yes, which method did you use?<br>Probe: Anything Else?<br>Record all items mentioned.                                         | Boil----- 1<br>Add weha agar----- 2<br>Strain it through a cloth----- 3<br>Use water filter (ceramic, sand, etc) ----- 4<br>Let it stand and settle----- 5<br>Other (specify) ----- 6                                                    |
| 29 | If Q28 yes, the last 24 hours did you treat the drinking water you are currently using?                                               | yes ..... 1<br>No..... 2                                                                                                                                                                                                                 |
| 30 | If Q30 yes, what did you use to treat the water you are currently using with?<br>Probe: Anything Else?<br>Record all items mentioned. | Add bleach /chlorine----- 1<br>Boil----- 2<br>Strain it through a cloth----- 3<br>Use water filter (ceramic, sand, etc) ----- 4                                                                                                          |

|    |                                                               |                                                                                                                                                        |
|----|---------------------------------------------------------------|--------------------------------------------------------------------------------------------------------------------------------------------------------|
|    |                                                               | Let it stand and settle----- 5<br>Other (specify) ----- 6                                                                                              |
| 31 | Why household water treatment important?                      | To make drinking water safe..... 1<br>Kills germs..... 2<br>remove turbidity ----- 3<br>No use ----- 4<br>don't know ..... 5<br>Other (specify)..... 6 |
| 32 | Do you store water at home?                                   | Yes ----- 1<br>No ----- 2                                                                                                                              |
| 33 | If Q33 yes, what type of water storage do you use at home?    | Jerrican ..... 1<br>Wide mouth Clay pot ..... 2<br>Bucket-----3<br>Other..... 4                                                                        |
| 34 | Was it covered? (during the time of data collection Observe)  | Yes ----- 1<br>No ----- 2                                                                                                                              |
| 35 | How did you remove drinking water from the storage container? | dipping ----- 1<br>pouring ----- 2<br>other (specify)----- 3                                                                                           |
| 36 | Where did you place the cups used for removing of water?      | On the floor ----- 1<br>On the storage container ----- 2<br>Place prepared to put it ----- 3<br>Other ( specify) ----- 4                               |
| 37 | Source of drinking water                                      | Protected -----1<br>Unprotected -----2                                                                                                                 |

### Part III: Household questionnaire related to Sanitation Facility

|    |                                                                                                       |                                                                                                                                                                         |
|----|-------------------------------------------------------------------------------------------------------|-------------------------------------------------------------------------------------------------------------------------------------------------------------------------|
| 38 | Do you have sanitation facility for member of your household? (ask permission to observe it)          | Yes, observed -----1<br>No -----2<br>Not permitted by the owner-----3                                                                                                   |
| 39 | If yes, for Q38, have you experience diarrhea in the last 2 weeks?                                    | Yes -----1<br>No -----2                                                                                                                                                 |
| 40 | If yes, for Q38, how many times you experience diarrhea in the last 2 weeks?                          | ≤ 1 times.....1<br>≥ 2 times ..... 2                                                                                                                                    |
| 41 | What kind of toilet facility do members of your house use?<br>ask permission to observe the facility. | Pit latrine with slab.....1<br>Pit latrine without slab / Open pit.....2<br>Ventilated Improved Pit latrine (VIP).3<br>Bucket facility..... 4<br>Other (specify)..... 5 |
| 42 | Do you share this sanitation facility with others who are not member of your household?               | Yes-----1<br>No ----- 2                                                                                                                                                 |
| 43 | Do children feces observe in the compound?<br>Please, Observe                                         | Yes.....1<br>No .....2                                                                                                                                                  |
| 44 | Do you maintain cleanliness of your latrine?<br>(observe)                                             | Yes -----1<br>No -----2                                                                                                                                                 |
| 45 | How does your household primarily dispose of household solid wastes disposal?                         | Dumped in street /open space -----1<br>Dump in waste pit -----2<br>Attached to sewer line-----3<br>Septic tank -----4                                                   |

|    |                                                                               |                                                                                                                                                |
|----|-------------------------------------------------------------------------------|------------------------------------------------------------------------------------------------------------------------------------------------|
|    |                                                                               | Other(specify) -----5                                                                                                                          |
| 46 | Do your household have solid waste disposal pit in your vicinity?             | Yes, appropriate.....1<br>No, inappropriate.....2                                                                                              |
| 47 | How does your household primarily dispose of household solid waste wastes?    | Dumped in street /open space -----1<br>Dump in waste pit -----2<br>Burned -----3<br>Composted-----4<br>Other(specify) -----5                   |
| 48 | How does your household primarily dispose of household liquid wastes?         | Dumped in street /open space -----1<br>Dump in waste pit -----2<br>Attached to sewer line-----3<br>Septic tank -----4<br>Other(specify) -----5 |
| 49 | Do your households have liquid waste disposal pit or system in your vicinity? | Yes, appropriate.....1<br>No, inappropriate.....2                                                                                              |
| 50 | What was the sanitation status?                                               | Improved -----1<br>Unimproved -----2                                                                                                           |

### Part VI: Household questionnaire related to Hygiene Practice

|    |                                                                                      |                                                                                                                                                                                                                                                                                    |
|----|--------------------------------------------------------------------------------------|------------------------------------------------------------------------------------------------------------------------------------------------------------------------------------------------------------------------------------------------------------------------------------|
| 51 | Do you have hand washing facility?<br>(ask permission to observe& see it)            | Yes -----1<br>No -----2                                                                                                                                                                                                                                                            |
| 52 | Do members of your household often wash their hands, attached to the toilet?         | Yes -----1<br>No -----2                                                                                                                                                                                                                                                            |
| 53 | Observe presence of water of the specific place for hand washing. Verify by checking | Water is available -----1<br>Water is not available -----2                                                                                                                                                                                                                         |
| 54 | Record if soap or detergent is present at the specific place for hand washing.       | Bar soap-----1<br>Detergent(Powder/Liquid/Paste) -----2<br>Liquid soap-----3<br>Ash/Sand-----4                                                                                                                                                                                     |
| 55 | Do you washed your hands with soap during the past 24 hours of a day                 | Yes.....1<br>No .....2                                                                                                                                                                                                                                                             |
| 56 | Do you wash your hands at such a critical time?                                      | <u>Handwashing at critical time</u> Yes    No<br>Before preparing food -----1    2<br>Before eating -----1    2<br>Before feeding Children-----1    2<br>After Visiting toilet----- -1    2<br>After helping Children's defecation--1    2<br>After handling of wastes -----1    2 |
| 57 | Do you attended hygiene education in the past one year                               | Yes.....1<br>No .....2                                                                                                                                                                                                                                                             |
| 58 | IF yes Q56, who had given hygiene education                                          | voluntary home care givers-----1<br>health institutions -----2<br>health extension workers-----3<br>NGOs -----4                                                                                                                                                                    |
| 59 | How was the hygiene practice status                                                  | Good-----1<br>Poor -----2                                                                                                                                                                                                                                                          |

**Part V: Household questionnaire related to Diarrheal Disease**

|    |                                                                         |                                                                                                   |
|----|-------------------------------------------------------------------------|---------------------------------------------------------------------------------------------------|
| 60 | Do you know the method of diarrheal disease transition?                 | Yes -----1<br>No -----2                                                                           |
| 61 | If yes, Q60 mention the methods                                         | -----<br>-----                                                                                    |
| 62 | Have you experience diarrhea in the last 2 weeks?                       | Yes -----1<br>No -----2                                                                           |
| 63 | If yes, Q62 how many times you experience diarrhea in the last 2 weeks? | ≤ 1 times.....1<br>≥ 2 times .....2                                                               |
| 64 | Do your families experienced diarrheal diseases in the last 2 weeks?    | Yes -----1<br>No -----2                                                                           |
| 65 | What do you do when you experience diarrheal disease                    | Visit health facility-----1<br>Home treatment-----2<br>Do nothing -----3                          |
| 66 | What method you used when you experienced diarrheal disease at home     | Use ORS-----1<br>More food consumption -----2<br>Taking antibiotics-----3<br>Other specify -----4 |

**Thank you very much for your cooperation!!**
